# Supplementary material for: Light-driven self-healing polyurethane based on PDA@Ag nanoparticles with improved mechanical and antibacterial properties
Source: Royal Society of Chemistry journal article supplement (doi:10.1039/d1tb02710g), 2022-01-01
Supplement: d1tb02710g1.pdf [file d1tb02710g1.pdf]

## Supporting Information

### Light-driven Self-healing Polyurethane based on PDA@Ag Nanoparticles with Improved Mechanical and Antibacterial Properties

Haibo Wang,<sup>a,b</sup> Rui Yan,<sup>a,b</sup> Yuke Zou,<sup>a</sup> Dongming Xing,<sup>c</sup> Kai Zhong,<sup>a\*</sup>

<sup>a</sup> College of Biomass Science and Engineering, Sichuan University, Chengdu 610065, PR China.

<sup>b</sup> The Key Laboratory of Leather Chemistry and Engineering of Ministry of Education, Sichuan University, Chengdu 610065, PR China. Tel: +86-28-85401296.

<sup>c</sup> Shandong Weigao Group Medical Polymer Company Limited.

\*Corresponding Authors: E-mail: eric211@163.com (K. Zhong).

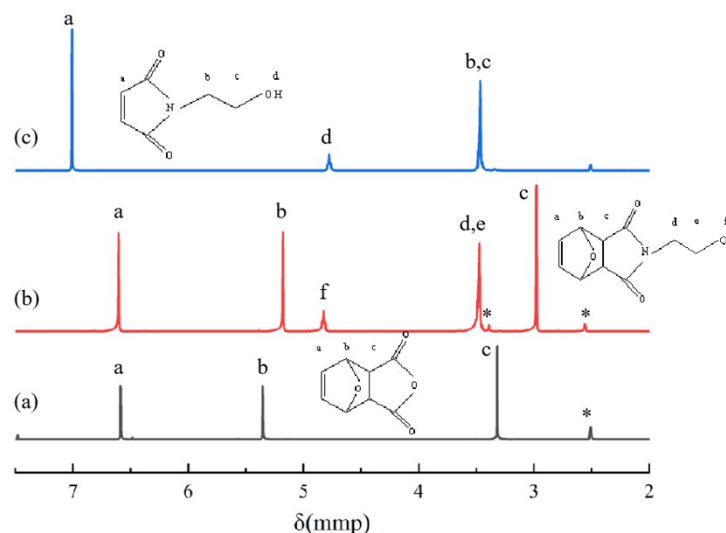

**Fig. S1** <sup>1</sup>H NMR spectrum of monomer. (a) Furan A; (b) HEMI-A; (c) HEMI

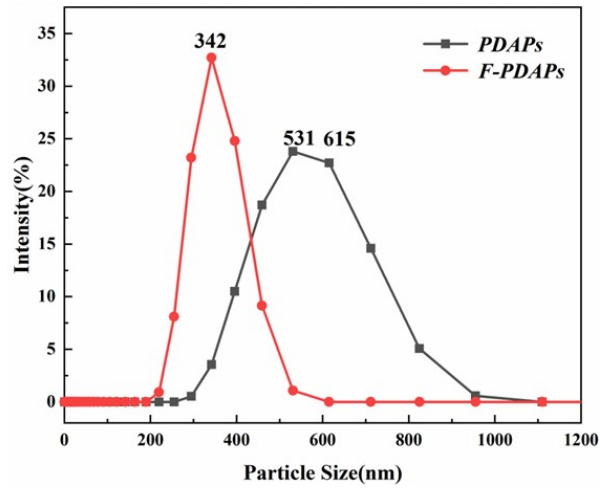

Fig. S2 DLS results of PDA and FPDA.

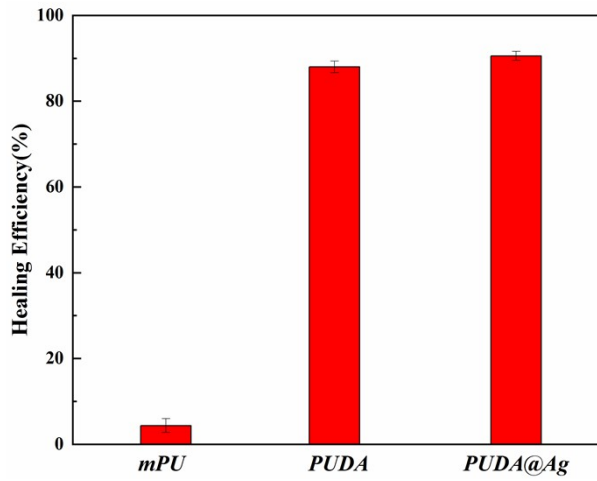

Fig. S3 Self-healing efficiency of PU composite films.

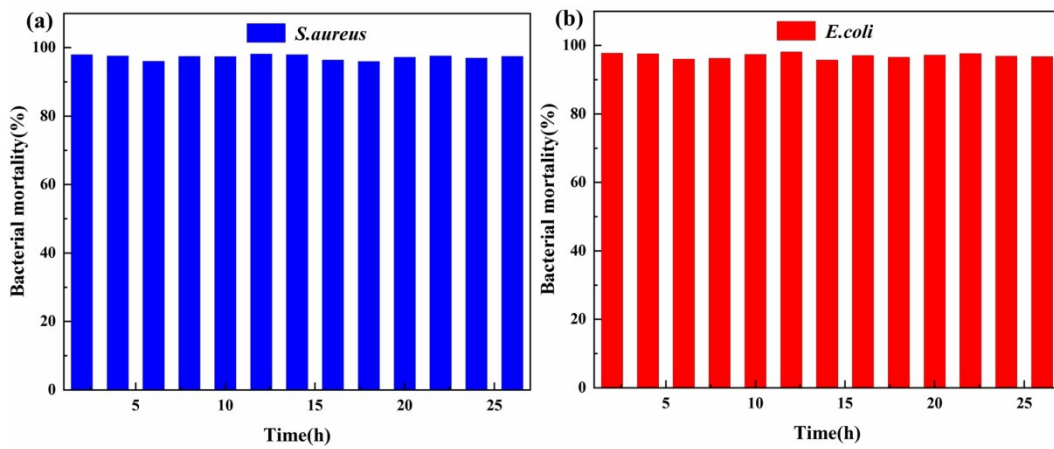

Fig. S4 The bacterial mortality (a) *S.aureus*, (b) *E.coli*.
